# Supplementary material for: Transcriptomics Analyses Reveal Wheat Responses to Drought Stress during Reproductive Stages under Field Conditions
Source: Front Plant Sci. 2017 Apr 21;8:592. doi: 10.3389/fpls.2017.00592 (PMC5399029; doi:10.3389/fpls.2017.00592)
Supplement: Supplementary file 1 [file Table1.XLSX]

## Sheet: Time point 4
Differentially-expressed genes at time point 4 (pistil and stamen differentiation stage)
The list of the 226 differentially expressed genes in the experiment is sorted in column A. For each gene are reported the log2 fold change (B), adjusted P value (C), relative homologous rice gene (column C), rice gene annotation (E), GenBank's non-redundant protein database annotation (F). Inf = gene absent in block D. _Inf= absent in block A
Gene_id	log2 ratio (block A / block D)	Adjusted pvalue	Rice gene code	Rice gene description	GenBank's non-redundant protein database description
Up regulated
Traes_2DS_229D264D2	Inf	5.656e-30	LOC_Os12g40480.2	H-BTB9 - Bric-a-Brac, Tramtrack, Broad Complex BTB domain with H family conserved sequence, expressed	predicted protein [Hordeum vulgare subsp. vulgare]
Traes_2DS_BB50DEEF8	6.5216	8.6393e-15	LOC_Os03g20700.2	magnesium-chelatase, putative, expressed	unknown [Zea mays]
Novel04410	5.8676	4.9228e-21	--	hypothetical protein TRIUR3_29662 [Triticum urartu]
Novel04034	5.6571	5.4938e-06	--	predicted protein [Hordeum vulgare subsp. vulgare]
Traes_2DS_0751C4087	3.5742	1.1295e-21	LOC_Os03g25490.2	cytochrome P450 72A1, putative, expressed	Cytochrome P450 family protein, expressed [Oryza sativa Japonica Group] >gi|215697416|dbj|BAG91410.1| unnamed protein product [Oryza sativa Japonica Group]
Traes_2AL_69F4F11E2	3.1335	1.9634e-07	LOC_Os01g37460.1	zinc finger family protein, putative, expressed	PREDICTED: uncharacterized RNA-binding protein C17H9.04c-like [Brachypodium distachyon]
Traes_1AL_4476835E0	3.0504	0.0139	LOC_Os05g49240.1	homeodomain-related, putative, expressed	predicted protein [Hordeum vulgare subsp. vulgare]
Traes_2DS_86240E975	2.9711	0.0033962	LOC_Os04g53380.1	expressed protein	OSJNBa0053K19.25 [Oryza sativa Japonica Group] >gi|222629594|gb|EEE61726.1| hypothetical protein OsJ_16233 [Oryza sativa Japonica Group]
Traes_7BL_E06D2A606	2.9073	0.039418	LOC_Os06g44220.1	OsRCI2-9 - Putative low temperature and salt responsive protein, expressed	predicted protein [Hordeum vulgare subsp. vulgare]
Traes_2DL_77F25CE27	2.8716	9.0096e-07	LOC_Os01g37460.1	zinc finger family protein, putative, expressed	PREDICTED: uncharacterized RNA-binding protein C17H9.04c-like [Brachypodium distachyon]
Traes_2DS_E3F28F0A9	2.846	0.015865	LOC_Os03g25490.2	cytochrome P450 72A1, putative, expressed	putative cytochrome P450 superfamily protein [Zea mays]
Traes_2BL_88A78A71E	2.3255	0.04039	LOC_Os03g29480.1	nodulation-signaling pathway 1 protein, putative, expressed	TPA: hypothetical protein ZEAMMB73_476167 [Zea mays]
Traes_2DS_C566FF97E	2.1719	0.0098059	LOC_Os07g42324.1	expressed protein	hypothetical protein SORBIDRAFT_03g024480 [Sorghum bicolor] >gi|241927737|gb|EES00882.1| hypothetical protein SORBIDRAFT_03g024480 [Sorghum bicolor]
Traes_4BS_E502A9C54	2.1301	1.4181e-08	LOC_Os11g41600.1	expressed protein	predicted protein [Hordeum vulgare subsp. vulgare] >gi|326519829|dbj|BAK00287.1| predicted protein [Hordeum vulgare subsp. vulgare]
Traes_1DL_B8D81484D	2.0355	0.00031481	--	--	predicted protein [Hordeum vulgare subsp. vulgare]
Traes_7AL_67921A952	1.9881	0.039418	LOC_Os08g02070.1	OsMADS26 - MADS-box family gene with MIKCc type-box, expressed	MIKC-type MADS-box transcription factor WM12 [Triticum aestivum]
Novel09118	1.9704	2.8586e-05	--	hypothetical protein F775_12961 [Aegilops tauschii]
Traes_3AL_B2FC57EB8	1.9562	0.00038244	LOC_Os01g53330.1	anthocyanidin 5,3-O-glucosyltransferase, putative, expressed	predicted protein [Hordeum vulgare subsp. vulgare]
Traes_7AS_E5659F6DC	1.9412	0.0092278	LOC_Os08g44590.1	gibberellin 20 oxidase 2, putative, expressed	predicted protein [Hordeum vulgare subsp. vulgare]
Traes_4DL_7B9B00B8D	1.8292	0.028725	LOC_Os10g27280.1	thaumatin, putative, expressed	predicted protein [Hordeum vulgare subsp. vulgare] >gi|326511876|dbj|BAJ92082.1| predicted protein [Hordeum vulgare subsp. vulgare]
Traes_2DS_8AEF03137	1.7903	1.1395e-08	LOC_Os07g46555.1	F-box domain containing protein, expressed	PREDICTED: F-box protein SKIP5-like [Brachypodium distachyon]
Novel07122	1.7846	9.2515e-05	-//-
Traes_4DL_9D7A18BBC	1.7366	9.2213e-06	LOC_Os03g12890.2	aminotransferase domain containing protein, putative, expressed	branched-chain amino acid aminotransferase [Hordeum vulgare subsp. vulgare]
Traes_7DS_4777DB553	1.7297	0.042767	LOC_Os02g01220.1	rhodanese-like domain containing protein, putative, expressed	predicted protein [Hordeum vulgare subsp. vulgare]
Traes_4BS_6C8C96440	1.6945	0.044558	LOC_Os07g08160.1	early light-induced protein, chloroplast precursor, putative, expressed	predicted protein [Hordeum vulgare subsp. vulgare]
Traes_5BL_88FA5246A	1.6766	1.1908e-11	LOC_Os07g08160.1	early light-induced protein, chloroplast precursor, putative, expressed	predicted protein [Hordeum vulgare subsp. vulgare]
Traes_1DL_8B761D07B	1.6504	0.0099738	LOC_Os05g49300.1	iron-sulfur cluster assembly enzyme ISCU, mitochondrial precursor, putative, expressed	hypothetical protein OsJ_02906 [Oryza sativa Japonica Group]
Traes_2DL_6CD064E13	1.6	0.037037	LOC_Os03g27280.1	CAMK_CAMK_like.19 - CAMK includes calcium/calmodulin depedent protein kinases, expressed	serine-threonine protein kinase [Triticum aestivum]
Traes_4AS_C10CD24DD	1.5884	0.0085408	LOC_Os07g06840.1	gibberellin receptor GID1L2, putative, expressed	PREDICTED: probable carboxylesterase 15-like [Brachypodium distachyon]
Novel06814	1.5881	5.7048e-08	-//-
Traes_4BL_C73920853	1.5718	1.9537e-07	LOC_Os07g08150.1	early light-induced protein, chloroplast precursor, putative, expressed	predicted protein [Hordeum vulgare subsp. vulgare]
Traes_5DL_3EE9B0FCD	1.5537	8.5367e-08	LOC_Os07g08160.1	early light-induced protein, chloroplast precursor, putative, expressed	predicted protein [Hordeum vulgare subsp. vulgare]
Novel08647	1.5433	0.00041533	--	predicted protein [Hordeum vulgare subsp. vulgare]
Traes_4DL_458D01B961	1.5367	5.4032e-06	LOC_Os07g08160.1	early light-induced protein, chloroplast precursor, putative, expressed	predicted protein [Hordeum vulgare subsp. vulgare]
Traes_2BS_6762A1AAE	1.4906	0.043868	LOC_Os04g11810.1	transferase family protein, putative, expressed	predicted protein [Hordeum vulgare subsp. vulgare]
Traes_5DL_C906A9208	1.4899	0.012243	LOC_Os09g15670.1	protein phosphatase 2C, putative, expressed	predicted protein [Hordeum vulgare subsp. vulgare]
Traes_2DL_D3A877875	1.4878	0.003424	LOC_Os04g55710.1	transposon protein, putative, unclassified, expressed	predicted protein [Hordeum vulgare subsp. vulgare]
Traes_4BL_C31F68A42	1.471	0.01308	LOC_Os01g14410.1	early light-induced protein, chloroplast precursor, putative, expressed	predicted protein [Hordeum vulgare subsp. vulgare]
Traes_5BL_1A9D2AC10	1.4668	7.2295e-05	LOC_Os09g15670.1	protein phosphatase 2C, putative, expressed	predicted protein [Hordeum vulgare subsp. vulgare]
Traes_1DS_059B70BED	1.4638	5.8715e-05	LOC_Os05g08480.1	cytokinin-O-glucosyltransferase 1, putative, expressed	predicted protein [Hordeum vulgare subsp. vulgare] >gi|326520996|dbj|BAJ92861.1| predicted protein [Hordeum vulgare subsp. vulgare]
Novel12086	1.4586	0.00069677	-//-
Traes_4BL_D3EFACE20	1.4354	0.0040162	LOC_Os03g07870.1	expressed protein	PREDICTED: uncharacterized protein LOC100843097 [Brachypodium distachyon]
Traes_2BL_740D59BE4	1.4266	0.030964	LOC_Os04g45834.2	DUF584 domain containing protein, putative, expressed	predicted protein [Hordeum vulgare subsp. vulgare]
Traes_7AS_0B6F9D4B5	1.4203	1.9748e-08	LOC_Os07g08160.1	early light-induced protein, chloroplast precursor, putative, expressed	predicted protein [Hordeum vulgare subsp. vulgare]
TRAES3BF120700040CFD_g	1.4191	0.00060762	LOC_Os07g08160.1	early light-induced protein, chloroplast precursor, putative, expressed	predicted protein [Hordeum vulgare subsp. vulgare] >gi|326511667|dbj|BAJ91978.1| predicted protein [Hordeum vulgare subsp. vulgare]
Traes_5DL_60524C948	1.4172	6.2713e-09	LOC_Os07g08150.1	early light-induced protein, chloroplast precursor, putative, expressed	predicted protein [Hordeum vulgare subsp. vulgare]
Traes_2BL_B69300543	1.4158	0.001611	LOC_Os04g45810.1	homeobox associated leucine zipper, putative, expressed	predicted protein [Hordeum vulgare subsp. vulgare]
Traes_1DL_5572BA753	1.4066	0.00044611	LOC_Os01g42260.4	transcriptional corepressor LEUNIG, putative, expressed	--
TRAES3BF120700010CFD_g	1.4003	1.3718e-08	LOC_Os07g08150.1	early light-induced protein, chloroplast precursor, putative, expressed	predicted protein [Hordeum vulgare subsp. vulgare]
Traes_1BS_3FADAD34F	1.3999	0.00084542	LOC_Os05g08480.1	cytokinin-O-glucosyltransferase 1, putative, expressed	predicted protein [Hordeum vulgare subsp. vulgare] >gi|326520996|dbj|BAJ92861.1| predicted protein [Hordeum vulgare subsp. vulgare]
Novel03890	1.3652	0.026279	--	WRKY45-like transcription factor [Triticum aestivum]
Traes_5BL_028D02DF6	1.3624	0.00060762	LOC_Os09g21180.1	homeobox associated leucine zipper, putative, expressed	predicted protein [Hordeum vulgare subsp. vulgare]
Traes_2DS_A2F0F9DEB	1.354	0.00012118	LOC_Os07g46640.1	UDP-N-acetylglucosamine--dolichyl-phosphate N-acetylglucosaminephosphotransferase, putative, expressed	predicted protein [Hordeum vulgare subsp. vulgare]
Traes_4AL_C9F401064	1.3524	6.2339e-05	LOC_Os02g01590.1	glycosyl hydrolases, putative, expressed	predicted protein [Hordeum vulgare subsp. vulgare]
Traes_7DL_CE37E2AF1	1.3452	0.00012099	LOC_Os08g02110.1	peroxidase precursor, putative, expressed	predicted protein [Hordeum vulgare subsp. vulgare]
Traes_7DS_D2378E14E	1.3429	0.030909	LOC_Os06g04920.1	zinc finger family protein, putative, expressed	predicted protein [Hordeum vulgare subsp. vulgare]
Traes_1BL_921B59F2E	1.3385	0.0072791	LOC_Os05g45880.1	phosphotransferase, putative, expressed	PREDICTED: choline/ethanolamine kinase-like [Brachypodium distachyon]
TRAES3BF036400010CFD_g	1.3308	0.00066189	LOC_Os01g09830.1	OsGrx_A2 - glutaredoxin subgroup III, expressed	predicted protein [Hordeum vulgare subsp. vulgare]
Traes_7AS_C284AB9C6	1.3289	0.0025132	--	--	high light protein [Hordeum vulgare] >gi|326516354|dbj|BAJ92332.1| predicted protein [Hordeum vulgare subsp. vulgare]
Traes_1AS_AA023B6B2	1.3254	0.014094	LOC_Os05g05030.1	expressed protein	predicted protein [Hordeum vulgare subsp. vulgare]
Traes_5AS_87457B94A	1.319	0.016973	LOC_Os11g30500.1	HVA22, putative, expressed	predicted protein [Hordeum vulgare subsp. vulgare]
Traes_4DS_61042797C	1.3108	0.00040892	LOC_Os03g45800.1	OsSAUR14 - Auxin-responsive SAUR gene family member, expressed	predicted protein [Hordeum vulgare subsp. vulgare]
Traes_5BS_72DE7510F	1.3083	0.00017352	LOC_Os02g35940.1	gibberellin receptor GID1L2, putative, expressed	predicted protein [Hordeum vulgare subsp. vulgare]
Traes_1AL_26E629ECA	1.3054	0.0010864	LOC_Os05g49300.1	iron-sulfur cluster assembly enzyme ISCU, mitochondrial precursor, putative, expressed	PREDICTED: iron-sulfur cluster assembly enzyme ISCU, mitochondrial-like [Brachypodium distachyon]
Traes_1DS_77E2F32B0	1.2989	0.0016896	LOC_Os10g30560.1	UDP-glucoronosyl and UDP-glucosyl transferase domain containing protein, expressed	predicted protein [Hordeum vulgare subsp. vulgare]
Traes_2DL_787806003	1.2967	0.016973	LOC_Os04g37490.1	oxidoreductase, aldo/keto reductase family protein, putative, expressed	PREDICTED: probable NAD(P)H-dependent oxidoreductase 1-like [Brachypodium distachyon]
Traes_6AS_E5666AE7C	1.2865	0.048413	LOC_Os02g01220.1	rhodanese-like domain containing protein, putative, expressed	predicted protein [Hordeum vulgare subsp. vulgare]
Traes_2AL_E713267A3	1.285	0.024477	LOC_Os04g55710.1	transposon protein, putative, unclassified, expressed	hypothetical protein OsJ_16431 [Oryza sativa Japonica Group]
Traes_5BS_ECB15B15A	1.2748	0.00023064	LOC_Os12g41090.1	CAMK_KIN1/SNF1/Nim1_like.38 - CAMK includes calcium/calmodulin depedent protein kinases, expressed	predicted protein [Hordeum vulgare subsp. vulgare]
Traes_2AL_454BAD62F	1.2741	0.031232	LOC_Os04g55710.1	transposon protein, putative, unclassified, expressed	asparaginase [Hordeum vulgare subsp. vulgare]
Traes_2DS_1BA7B8A2C	1.2655	0.0015373	LOC_Os11g32650.1	chalcone synthase, putative, expressed	chalcone synthase [Triticum aestivum] >gi|33465874|gb|AAQ19322.1| chalcone synthase [Triticum aestivum]
Traes_4AS_6C0AB5E18	1.2642	0.0087309	LOC_Os03g12890.2	aminotransferase domain containing protein, putative, expressed	branched-chain amino acid aminotransferase [Hordeum vulgare subsp. vulgare]
Traes_7AS_6B6BF3A81	1.2608	1.8524e-05	LOC_Os02g01590.1	glycosyl hydrolases, putative, expressed	sucrose:sucrose 1-fructosyltransferase [Triticum urartu]
Traes_4AL_AA83843E9	1.2567	0.0295	LOC_Os11g20090.1	O-methyltransferase, putative, expressed	predicted protein [Hordeum vulgare subsp. vulgare]
Traes_2AL_BFB0C6D4C	1.2485	0.020211	LOC_Os04g45810.1	homeobox associated leucine zipper, putative, expressed	predicted protein [Hordeum vulgare subsp. vulgare]
Traes_4DS_C19065A90	1.2399	9.131e-05	LOC_Os08g01120.1	sulfate transporter, putative, expressed	predicted protein [Hordeum vulgare subsp. vulgare]
Traes_2DL_5FFD17526	1.2367	0.013015	LOC_Os04g58710.1	AMP-binding domain containing protein, expressed	predicted protein [Hordeum vulgare subsp. vulgare] >gi|326526109|dbj|BAJ93231.1| predicted protein [Hordeum vulgare subsp. vulgare]
Traes_6AS_B2526D636	1.227	0.0013103	LOC_Os07g13660.1	UDP-glucoronosyl and UDP-glucosyl transferase domain containing protein, expressed	PREDICTED: UDP-glycosyltransferase 76F1-like [Brachypodium distachyon]
Traes_6DL_18CB2742C	1.2205	0.00063425	LOC_Os02g57280.1	CBS domain containing membrane protein, putative, expressed	predicted protein [Hordeum vulgare subsp. vulgare]
Traes_4AS_D13EBCE43	1.2045	0.00036515	LOC_Os01g14410.1	early light-induced protein, chloroplast precursor, putative, expressed	predicted protein [Hordeum vulgare subsp. vulgare]
Traes_4DL_66622180C	1.204	0.0035999	LOC_Os07g08150.1	early light-induced protein, chloroplast precursor, putative, expressed	predicted protein [Hordeum vulgare subsp. vulgare]
Traes_6AL_1553C8C96	1.1963	0.038952	LOC_Os02g54560.1	SCP-like extracellular protein, expressed	Os02g0786900 [Oryza sativa Japonica Group] >gi|113537868|dbj|BAF10251.1| Os02g0786900 [Oryza sativa Japonica Group] >gi|215740642|dbj|BAG97298.1| unnamed protein product [Oryza sativa Japonica Group]
Traes_4AS_1820493B9	1.1943	0.021625	LOC_Os03g12700.1	expressed protein	predicted protein [Hordeum vulgare subsp. vulgare] >gi|326534058|dbj|BAJ89379.1| predicted protein [Hordeum vulgare subsp. vulgare]
Traes_7DL_AAD0A273B1	1.1915	0.019622	LOC_Os06g44190.1	expressed protein	predicted protein [Hordeum vulgare subsp. vulgare] >gi|326504786|dbj|BAK06684.1| predicted protein [Hordeum vulgare subsp. vulgare] >gi|326530276|dbj|BAJ97564.1| predicted protein [Hordeum vulgare subsp. vulgare] >gi|326533990|dbj|BAJ93768.1| predicted protein [Hordeum vulgare subsp. vulgare]
Traes_5BL_56C366434	1.186	0.0062829	LOC_Os01g53390.1	glucosyltransferase, putative, expressed	PREDICTED: anthocyanidin 5,3-O-glucosyltransferase-like [Brachypodium distachyon]
TRAES3BF094000010CFD_g	1.1849	0.020033	LOC_Os01g71190.1	photosystem II reaction center PSB28 protein, chloroplast precursor, putative, expressed	predicted protein [Hordeum vulgare subsp. vulgare]
Traes_2AL_C7E806D1A	1.1811	0.028239	LOC_Os04g55710.1	transposon protein, putative, unclassified, expressed	predicted protein [Hordeum vulgare subsp. vulgare]
Traes_4BS_12A6550BE	1.1703	0.022995	LOC_Os10g05970.1	POEI12 - Pollen Ole e I allergen and extensin family protein precursor, expressed	predicted protein [Hordeum vulgare subsp. vulgare]
Traes_2BL_1C31451BE	1.1701	9.131e-05	LOC_Os04g40630.1	BTBZ4 - Bric-a-Brac, Tramtrack, Broad Complex BTB domain with TAZ zinc finger and Calmodulin-binding domains, expressed	predicted protein [Hordeum vulgare subsp. vulgare]
Traes_2DL_8A589308A	1.1635	0.001249	LOC_Os04g33310.1	expressed protein	predicted protein [Hordeum vulgare subsp. vulgare]
Traes_2DL_0E2E3EC45	1.163	0.00056958	LOC_Os07g19000.1	LTPL41 - Protease inhibitor/seed storage/LTP family protein precursor, expressed	TPA: putative bifunctional inhibitor/lipid-transfer protein/seed storage 2S albumin superfamily protein [Zea mays]
Traes_7AS_9E64AEFF8	1.1622	0.010864	LOC_Os08g45190.1	PGR5, putative, expressed	proton gradient regulation 5 [Triticum aestivum] >gi|380850922|gb|AFE85902.1| proton gradient regulation 5 [Triticum aestivum] >gi|393690730|gb|AFN11571.1| proton gradient regulation 5 [Triticum aestivum] >gi|393690734|gb|AFN11573.1| proton gradient regulation 5 [Triticum aestivum]
Traes_5DL_81D898FB7	1.1544	0.020211	LOC_Os11g05400.1	Ser/Thr protein phosphatase family protein, putative, expressed	predicted protein [Hordeum vulgare subsp. vulgare]
Traes_2DL_957ED041B	1.1524	0.0020494	LOC_Os04g55710.1	transposon protein, putative, unclassified, expressed	asparaginase [Hordeum vulgare subsp. vulgare]
Novel13135	1.1483	0.0091671	--	fructan:fructan 1-fructosyltransferase [Triticum turgidum subsp. durum]
TRAES3BF046700020CFD_g	1.1468	0.0295	LOC_Os12g13910.1	expressed protein	predicted protein [Hordeum vulgare subsp. vulgare]
Traes_5DL_F8A60AE39	1.144	0.0001647	LOC_Os07g08160.1	early light-induced protein, chloroplast precursor, putative, expressed	predicted protein [Hordeum vulgare subsp. vulgare] >gi|326506168|dbj|BAJ86402.1| predicted protein [Hordeum vulgare subsp. vulgare] >gi|326506586|dbj|BAJ91334.1| predicted protein [Hordeum vulgare subsp. vulgare] >gi|326513888|dbj|BAJ92094.1| predicted protein [Hordeum vulgare subsp. vulgare]
Traes_2DL_C0E026879	1.1424	0.012341	LOC_Os04g41560.2	B-box zinc finger family protein, putative, expressed	putative zinc finger protein [Triticum aestivum]
Traes_2BL_2C396C4A6	1.1357	0.029379	LOC_Os04g40560.1	WD domain, G-beta repeat domain containing protein, expressed	predicted protein [Hordeum vulgare subsp. vulgare]
Traes_2BL_87F42D895	1.1314	0.00029333	LOC_Os03g38730.1	peroxisomal membrane protein, putative, expressed	predicted protein [Hordeum vulgare subsp. vulgare] >gi|326508638|dbj|BAJ95841.1| predicted protein [Hordeum vulgare subsp. vulgare]
Traes_5BL_EF6914D8B	1.1244	0.031464	LOC_Os06g08640.1	transferase family protein, putative, expressed	hypothetical protein SORBIDRAFT_02g024990 [Sorghum bicolor] >gi|241925774|gb|EER98918.1| hypothetical protein SORBIDRAFT_02g024990 [Sorghum bicolor]
Traes_7DS_B69B63F78	1.1208	0.012516	LOC_Os06g07760.1	sulfiredoxin-1, putative, expressed	predicted protein [Hordeum vulgare subsp. vulgare]
Novel00311	1.1097	0.00013032	--	predicted protein [Hordeum vulgare subsp. vulgare]>gi|326509401|dbj|BAJ91617.1| predicted protein [Hordeum vulgare subsp. vulgare]>gi|326511553|dbj|BAJ91921.1| predicted protein [Hordeum vulgare subsp. vulgare]
TRAES3BF026300010CFD_g	1.104	0.01534	LOC_Os01g45470.1	expressed protein	predicted protein [Hordeum vulgare subsp. vulgare]
Traes_1AL_61464BAA6	1.101	0.029349	LOC_Os01g04040.1	BBTI11 - Bowman-Birk type bran trypsin inhibitor precursor, putative, expressed	putative proteinase inhibitor-related protein [Triticum aestivum] >gi|163955788|gb|ABY49937.1| putative Bowman-Birk type wound-induced protease inhibitor [Triticum dicoccoides] >gi|163955790|gb|ABY49938.1| putative Bowman-Birk type wound-induced protease inhibitor [Triticum dicoccoides]
Traes_6DS_D50A0F246	1.0992	0.030271	LOC_Os02g01355.1	MADS-box transcription factor, putative, expressed	MADS-box transcription factor TaAGL18 [Triticum aestivum] >gi|161158806|emb|CAM59061.1| MIKC-type MADS-box transcription factor WM18 [Triticum aestivum]
Traes_1AL_0C41C44B1	1.0929	0.00017352	LOC_Os05g50930.1	RNA polymerase sigma factor, putative, expressed	predicted protein [Hordeum vulgare subsp. vulgare] >gi|326503904|dbj|BAK02738.1| predicted protein [Hordeum vulgare subsp. vulgare]
Traes_2BL_9A4B3C539	1.0907	0.00012099	LOC_Os04g41560.2	B-box zinc finger family protein, putative, expressed	putative zinc finger protein [Triticum aestivum]
TRAES3BF069100050CFD_g	1.0861	9.131e-05	LOC_Os01g62760.1	protein phosphatase 2C, putative, expressed	predicted protein [Hordeum vulgare subsp. vulgare]
Traes_3AL_D0D664153	1.0857	0.0021252	LOC_Os01g60830.1	expressed protein	predicted protein [Hordeum vulgare subsp. vulgare]
Traes_3AS_4DF357170	1.0767	0.0017961	LOC_Os01g09640.1	Myb transcription factor, putative, expressed	predicted protein [Hordeum vulgare subsp. vulgare]
Traes_7DS_B06CC6A9E	1.0754	0.014954	LOC_Os06g19590.1	estradiol 17-beta-dehydrogenase 12, putative, expressed	predicted protein [Hordeum vulgare subsp. vulgare]
Traes_5DL_6E2DD80321	1.0734	0.00011344	LOC_Os03g55776.1	expressed protein	predicted protein [Hordeum vulgare subsp. vulgare]
Traes_7DS_86BB91D98	1.073	0.0082478	--	--	high light protein [Hordeum vulgare] >gi|326516354|dbj|BAJ92332.1| predicted protein [Hordeum vulgare subsp. vulgare]
Traes_5BL_CABBB63B1	1.0705	0.042767	LOC_Os03g52910.1	uncharacterized UPF0114 domain containing protein, expressed	predicted protein [Hordeum vulgare subsp. vulgare]
Traes_2BS_0FA5E53AD	1.0695	0.028147	LOC_Os11g32650.1	chalcone synthase, putative, expressed	RecName: Full=Chalcone synthase 2; AltName: Full=Naringenin-chalcone synthase 2 >gi|1150936|emb|CAA63305.1| chalcone synthase [Secale cereale]
TRAES3BF042200050CFD_g	1.0679	0.0037829	LOC_Os01g12580.1	late embryogenesis abundant protein, putative, expressed	dehydrin [Triticum durum]
Traes_2BL_9472831A4	1.065	0.047523	LOC_Os04g33310.1	expressed protein	predicted protein [Hordeum vulgare subsp. vulgare]
Traes_5AL_44BD0B403	1.0599	0.016099	LOC_Os09g32640.1	dehydrogenase, putative, expressed	predicted protein [Hordeum vulgare subsp. vulgare]
Traes_1DL_37EA23493	1.0553	0.039923	LOC_Os05g50930.1	RNA polymerase sigma factor, putative, expressed	predicted protein [Hordeum vulgare subsp. vulgare] >gi|326503904|dbj|BAK02738.1| predicted protein [Hordeum vulgare subsp. vulgare]
Traes_4DS_28BFE50C5	1.0535	0.023812	LOC_Os03g45720.1	glyoxalase family protein, putative, expressed	PREDICTED: uncharacterized protein LOC100832830 [Brachypodium distachyon]
Traes_2BL_AE75D6172	1.0519	0.00027192	LOC_Os04g55710.1	transposon protein, putative, unclassified, expressed	asparaginase [Hordeum vulgare subsp. vulgare]
Traes_7BS_7E9C070B8	1.0501	0.037859	LOC_Os06g21380.1	OsCttP3 - Putative C-terminal processing peptidase homologue, expressed	predicted protein [Hordeum vulgare subsp. vulgare]
Traes_2DL_C2CFFECCA	1.0494	0.039418	LOC_Os04g33570.1	RCN4 Centroradialis-like1 homologous to TFL1 gene; contains Pfam profile PF01161: Phosphatidylethanolamine-binding protein, expressed	centroradialis [Hordeum vulgare]
Novel15524	1.0411	0.00029828	--	dehydrin [Triticum aestivum]>gi|475625127|gb|EMT32858.1| Cold-shock protein CS120 [Aegilops tauschii]
Traes_1BL_2426A1F42	1.0383	0.011654	LOC_Os10g17260.1	cytochrome P450, putative, expressed	flavonoid 3'-hydroxylase [Triticum aestivum]
Traes_7DS_E488AA1F2	1.0383	0.00041186	LOC_Os02g01590.1	glycosyl hydrolases, putative, expressed	sucrose:sucrose 1-fructosytransferase [Triticum aestivum] >gi|55847605|dbj|BAD72792.1| sucrose:sucrose 1-fructosyltransferase [Triticum aestivum]
TRAES3BF115000050CFD_g	1.0375	0.029379	LOC_Os01g12190.1	expressed protein	predicted protein [Hordeum vulgare subsp. vulgare]
Traes_7DL_6A6BEA0C5	1.036	0.0028258	LOC_Os08g35860.1	cytokinin dehydrogenase precursor, putative, expressed	cytokinin oxidase/dehydrogenase 3 [Triticum aestivum]
Traes_3DL_D00248FE6	1.0349	0.00053398	LOC_Os01g60830.1	expressed protein	predicted protein [Hordeum vulgare subsp. vulgare]
Traes_1BL_A7A6C5DB1	1.0274	0.0016259	LOC_Os05g50930.1	RNA polymerase sigma factor, putative, expressed	predicted protein [Hordeum vulgare subsp. vulgare]
Traes_2BS_AED10CD44	1.0161	0.0033182	LOC_Os03g18150.1	protein phosphatase 2C, putative, expressed	predicted protein [Hordeum vulgare subsp. vulgare]
Traes_4DL_CC64A40E5	1.0142	0.044067	LOC_Os03g02860.1	heavy metal-associated domain containing protein, expressed	predicted protein [Hordeum vulgare subsp. vulgare] >gi|326519626|dbj|BAK00186.1| predicted protein [Hordeum vulgare subsp. vulgare]
Traes_2BL_551524B9B	1.0099	0.020211	LOC_Os04g52210.1	terpene synthase, putative, expressed	ent-kaurene synthase like 5 [Triticum aestivum]
Traes_2DS_D58C49346	1.0063	0.00077525	LOC_Os07g46520.1	rhythmically expressed gene 2 protein, putative, expressed	predicted protein [Hordeum vulgare subsp. vulgare]
Novel14820	1.0009	0.01586	-//-
Traes_2BL_171ABA978	0.99175	0.002248	LOC_Os04g57880.1	heat shock protein DnaJ, putative, expressed	predicted protein [Hordeum vulgare subsp. vulgare]
Traes_1BL_5059FD5F8	0.99037	0.00060567	LOC_Os01g14410.1	early light-induced protein, chloroplast precursor, putative, expressed	predicted protein [Hordeum vulgare subsp. vulgare]
Traes_5AL_0F8A92CEA	0.98089	0.039748	LOC_Os03g59720.1	ribosomal protein L36 containing protein, expressed	PH01B015M02.15 [Phyllostachys edulis]
Traes_4AS_5C4ADB91B	0.98087	0.039644	LOC_Os03g17800.1	phosphatidylinositol transfer protein alpha isoform, putative, expressed	predicted protein [Hordeum vulgare subsp. vulgare]
Traes_2DL_82737388E	0.9786	0.0017364	LOC_Os03g38730.1	peroxisomal membrane protein, putative, expressed	predicted protein [Hordeum vulgare subsp. vulgare] >gi|326508638|dbj|BAJ95841.1| predicted protein [Hordeum vulgare subsp. vulgare]
TRAES3BF054800020CFD_g	0.97628	0.0047708	LOC_Os01g08440.1	UDP-glucoronosyl and UDP-glucosyl transferase domain containing protein, expressed	predicted protein [Hordeum vulgare subsp. vulgare]
Traes_2AS_95611CAD2	0.97393	0.00055296	LOC_Os04g17100.1	heavy metal-associated domain containing protein, expressed	farnesylated protein 1 [Hordeum vulgare subsp. vulgare]
TRAES3BF076800040CFD_g	0.97129	0.0014814	LOC_Os01g74020.1	MYB family transcription factor, putative, expressed	predicted protein [Hordeum vulgare subsp. vulgare]
Traes_1AL_BEFAA871B	0.9665	0.0059097	LOC_Os01g14410.1	early light-induced protein, chloroplast precursor, putative, expressed	predicted protein [Hordeum vulgare subsp. vulgare] >gi|326509401|dbj|BAJ91617.1| predicted protein [Hordeum vulgare subsp. vulgare] >gi|326511553|dbj|BAJ91921.1| predicted protein [Hordeum vulgare subsp. vulgare]
Traes_1BL_5AEE95D4C	0.96477	0.00093804	LOC_Os01g14410.1	early light-induced protein, chloroplast precursor, putative, expressed	predicted protein [Hordeum vulgare subsp. vulgare] >gi|326509401|dbj|BAJ91617.1| predicted protein [Hordeum vulgare subsp. vulgare] >gi|326511553|dbj|BAJ91921.1| predicted protein [Hordeum vulgare subsp. vulgare]
Novel04033	0.96242	0.037906	--	predicted protein [Hordeum vulgare subsp. vulgare]
Traes_2AL_8672AB691	0.95656	0.0017979	LOC_Os08g32120.1	expressed protein	predicted protein [Hordeum vulgare subsp. vulgare]
Traes_2BL_EDACDB387	0.95396	0.0059097	LOC_Os04g58710.1	AMP-binding domain containing protein, expressed	predicted protein [Hordeum vulgare subsp. vulgare] >gi|326526109|dbj|BAJ93231.1| predicted protein [Hordeum vulgare subsp. vulgare]
Traes_2BL_F8C3E2003	0.95173	0.046982	LOC_Os07g03120.1	expressed protein	predicted protein [Hordeum vulgare subsp. vulgare]
Traes_4BS_6B84CEEE3	0.94507	0.015865	LOC_Os09g39560.1	genetic modifier, putative, expressed	predicted protein [Hordeum vulgare subsp. vulgare]
Traes_2DS_8827E95F0	0.93528	0.023812	LOC_Os11g32650.1	chalcone synthase, putative, expressed	predicted protein [Hordeum vulgare subsp. vulgare]
Traes_2BL_0D44F4C96	0.93456	0.0073201	LOC_Os04g55710.1	transposon protein, putative, unclassified, expressed	predicted protein [Hordeum vulgare subsp. vulgare]
Traes_4DL_F6ADA799C	0.93298	0.047523	LOC_Os03g08960.1	homeobox associated leucine zipper, putative, expressed	predicted protein [Hordeum vulgare subsp. vulgare]
Traes_2DL_82C3CB295	0.93276	0.044457	LOC_Os04g40600.1	peptide methionine sulfoxide reductase, putative, expressed	peptide methionine sulfoxide reductase [Secale cereale]
Traes_7BS_462DD3C32	0.93266	0.037906	LOC_Os06g21380.1	OsCttP3 - Putative C-terminal processing peptidase homologue, expressed	predicted protein [Hordeum vulgare subsp. vulgare]
Traes_7AS_95F4E4729	0.93194	0.035386	LOC_Os06g21380.1	OsCttP3 - Putative C-terminal processing peptidase homologue, expressed	predicted protein [Hordeum vulgare subsp. vulgare]
Traes_2BS_BE3E32F19	0.92874	0.042767	LOC_Os01g71420.1	Ser/Thr protein phosphatase family protein, putative, expressed	predicted protein [Hordeum vulgare subsp. vulgare]
Traes_2BS_45CD5B99E	0.91599	0.026854	LOC_Os04g17100.1	heavy metal-associated domain containing protein, expressed	farnesylated protein 1 [Hordeum vulgare subsp. vulgare]
Traes_4DL_438BC69F9	0.91531	0.021777	LOC_Os03g02610.1	glycosyl hydrolases family 16 protein, protein, expressed	conserved hypothetical protein [Triticum aestivum]
Traes_2DL_F23E85139	0.9137	0.0041097	LOC_Os04g52110.1	late embryogenesis abundant protein, group 3, putative, expressed	chloroplast-targeted COR protein [Triticum aestivum]
Traes_5AL_F1FCC41BA	0.90954	0.0092278	LOC_Os03g60580.1	actin-depolymerizing factor, putative, expressed	WCOR719 [Triticum aestivum]
Novel17283	0.90893	0.0082478	--	predicted protein [Hordeum vulgare subsp. vulgare]
Traes_3DL_304C8DD67	0.90215	0.039418	LOC_Os01g37910.2	vacuolar-processing enzyme precursor, putative, expressed	predicted protein [Hordeum vulgare subsp. vulgare]
Traes_2BL_FEAE434B4	0.9003	0.035903	LOC_Os04g56240.1	lipase, putative, expressed	predicted protein [Hordeum vulgare subsp. vulgare]
Traes_7DS_5A68A26E9	0.90029	0.0046045	LOC_Os02g01590.1	glycosyl hydrolases, putative, expressed	fructan:fructan 1-fructosyltransferase [Triticum aestivum]
Traes_7AS_65CEFA8DD	0.89929	0.014271	LOC_Os03g21810.1	insulin-degrading enzyme, putative, expressed	predicted protein [Hordeum vulgare subsp. vulgare] >gi|326526461|dbj|BAJ97247.1| predicted protein [Hordeum vulgare subsp. vulgare] >gi|326532948|dbj|BAJ89319.1| predicted protein [Hordeum vulgare subsp. vulgare]
TRAES3BF041000100CFD_g	0.89801	0.01534	LOC_Os01g03040.1	expressed protein	conserved hypothetical protein, expressed [Triticum aestivum]
Traes_6AS_992ED2B28	0.89069	0.033796	LOC_Os02g07930.1	B-box zinc finger family protein, putative, expressed	PREDICTED: uncharacterized protein LOC100827682 [Brachypodium distachyon]
Traes_7DS_5E23019F5	0.88954	0.0092278	LOC_Os04g45290.1	glycosyl hydrolases, putative, expressed	fructan:fructan 1-fructosyltransferase [Triticum aestivum]
Traes_3AS_6D1315D0A	0.87848	0.041524	LOC_Os01g11940.1	osFTL1 FT-Like1 homologous to Flowering Locus T gene; contains Pfam profile PF01161: Phosphatidylethanolamine-binding protein, expressed	FT-like protein [Hordeum vulgare subsp. vulgare] >gi|326522220|dbj|BAK04238.1| predicted protein [Hordeum vulgare subsp. vulgare]
Traes_5BL_557B0C330	0.87566	0.0072791	LOC_Os03g55776.1	expressed protein	predicted protein [Hordeum vulgare subsp. vulgare]
Traes_2DS_B9D014DE1	0.87559	0.047234	LOC_Os11g32650.1	chalcone synthase, putative, expressed	chalcone synthase [Triticum aestivum]
Traes_2BL_EDC025B5E	0.87516	0.047523	LOC_Os08g32120.1	expressed protein	predicted protein [Hordeum vulgare subsp. vulgare]
Traes_6AL_3751FB9EB	0.85658	0.0092278	LOC_Os02g47620.3	hydrolase, alpha/beta fold family domain containing protein, expressed	predicted protein [Hordeum vulgare subsp. vulgare] >gi|326514070|dbj|BAJ92185.1| predicted protein [Hordeum vulgare subsp. vulgare]
Traes_2BL_FDEA6E1DB	0.85535	0.015865	LOC_Os04g43650.2	L-allo-threonine aldolase, putative, expressed	PREDICTED: L-allo-threonine aldolase-like [Brachypodium distachyon]
Traes_5AL_DC975C4DB	0.84601	0.030964	LOC_Os03g60580.1	actin-depolymerizing factor, putative, expressed	WCOR719 [Triticum aestivum]
Traes_7DL_2826B2A7E	0.84127	0.01248	LOC_Os06g47970.1	expressed protein	predicted protein [Hordeum vulgare subsp. vulgare] >gi|326518728|dbj|BAJ92525.1| predicted protein [Hordeum vulgare subsp. vulgare] >gi|326518848|dbj|BAJ92585.1| predicted protein [Hordeum vulgare subsp. vulgare]
Traes_4DS_69B276FD2	0.83799	0.015865	LOC_Os09g39560.1	genetic modifier, putative, expressed	predicted protein [Hordeum vulgare subsp. vulgare]
Traes_1DL_22691613B	0.83607	0.048364	LOC_Os05g38660.1	expressed protein	predicted protein [Hordeum vulgare subsp. vulgare]
Traes_2AL_974282B60	0.83348	0.027825	LOC_Os04g38390.1	wound/stress protein, putative, expressed	PREDICTED: uncharacterized protein LOC100841793 [Brachypodium distachyon]
Traes_2BL_6382E3EFF	0.80332	0.029601	LOC_Os04g52110.1	late embryogenesis abundant protein, group 3, putative, expressed	cold acclimation protein WCS19 [Triticum aestivum]
TRAES3BF018800030CFD_g	0.80293	0.023685	LOC_Os01g63460.1	MYB family transcription factor, putative, expressed	MYB-related protein [Aegilops speltoides]
Traes_3AL_3694A7CE6	0.80225	0.03524	LOC_Os01g71190.1	photosystem II reaction center PSB28 protein, chloroplast precursor, putative, expressed	predicted protein [Hordeum vulgare subsp. vulgare]
Traes_6AL_BFB21AE09	0.80176	0.042565	LOC_Os08g16910.1	dehydrogenase, putative, expressed	predicted protein [Hordeum vulgare subsp. vulgare]
Traes_2BS_602A11B26	0.80138	0.029016	LOC_Os07g41160.1	protein of unknown function DUF1675 domain containing protein, expressed	RecName: Full=Ninja-family protein 3; AltName: Full=ABI five-binding protein D1; Short=ABI5-binding protein D1; Short=TaAFP-D1 >gi|169788697|dbj|BAG12829.1| ABI5 binding protein D1 [Triticum aestivum]
Traes_4AL_CCB185362	0.79689	0.021777	LOC_Os11g06720.1	abscisic stress-ripening, putative, expressed	abscisic stress-ripening protein [Triticum aestivum]
Traes_4BS_C0973D1DA	0.78911	0.042767	LOC_Os11g09020.1	amino acid transporter, putative, expressed	predicted protein [Hordeum vulgare subsp. vulgare] >gi|388596096|emb|CCI51006.1| amino acid permease [Hordeum vulgare subsp. vulgare]
Traes_7DS_E34DA2F50	0.78224	0.042565	LOC_Os02g01590.1	glycosyl hydrolases, putative, expressed	sucrose:fructan 6-fructosyltransferase [Triticum aestivum]
Traes_6DL_52B87D89E	0.77771	0.030024	LOC_Os02g47620.3	hydrolase, alpha/beta fold family domain containing protein, expressed	predicted protein [Hordeum vulgare subsp. vulgare]
Traes_4AL_5BA6F70F8	0.7762	0.038922	LOC_Os07g26690.1	aquaporin protein, putative, expressed	predicted protein [Hordeum vulgare subsp. vulgare] >gi|326510601|dbj|BAJ87517.1| predicted protein [Hordeum vulgare subsp. vulgare]
Traes_7DS_12C14942B	0.74814	0.045273	LOC_Os06g06320.1	osFTL2 FT-Like2 homologous to Flowering Locus T gene; contains Pfam profile PF01161: Phosphatidylethanolamine-binding protein, expressed	flowering locus T [Triticum aestivum]
Novel08582	0.74395	0.048413	--	hypothetical protein F775_30523 [Aegilops tauschii]
Down regulated
Novel07940	-4.9659	0.0055772	--	hypothetical protein F775_24187 [Aegilops tauschii]
Traes_2BS_603844095	-4.3346	1.3821e-05	LOC_Os02g33420.1	ATPase, AAA family protein, expressed	PREDICTED: chaperone protein ClpB1-like [Brachypodium distachyon]
Traes_5DS_5143441CB	-3.9154	0.020211	LOC_Os12g35330.1	OsGrx_C12 - glutaredoxin subgroup III, expressed	PREDICTED: putative glutaredoxin-C14-like [Brachypodium distachyon]
Traes_2BS_E482C7922	-3.7161	0.0010761	LOC_Os02g33420.1	ATPase, AAA family protein, expressed	Os02g0537400 [Oryza sativa Japonica Group] >gi|255670973|dbj|BAF08962.2| Os02g0537400 [Oryza sativa Japonica Group]
Traes_5DS_CCCDA48421	-3.1699	0.00053498	LOC_Os12g35330.1	OsGrx_C12 - glutaredoxin subgroup III, expressed	predicted protein [Hordeum vulgare subsp. vulgare]
Novel08700	-3.1008	0.00011173	--	hypothetical protein F775_25282 [Aegilops tauschii]
Traes_5BL_16DA2DF8A	-2.9946	2.8209e-07	LOC_Os03g61550.1	heat shock protein DnaJ, putative, expressed	DnaJ-like protein [Oryza sativa Japonica Group] >gi|31249738|gb|AAP46230.1| putative heat shock protein [Oryza sativa Japonica Group] >gi|108711908|gb|ABF99703.1| DnaJ domain containing protein, expressed [Oryza sativa Japonica Group]
Novel10986	-2.8484	4.7848e-19	--	hypothetical protein F775_00382 [Aegilops tauschii]
Novel06374	-2.7577	1.9514e-06	--	hypothetical protein TRIUR3_16516 [Triticum urartu]
TRAES3BF050800370CFD_g	-2.7304	0.025744	LOC_Os11g40590.2	DUF1399 containing protein, putative, expressed	conserved hypothetical protein, Hv-pg1 homolog,putative, expressed [Triticum aestivum]
Novel04402	-2.3421	0.025932	-//-
Novel17601	-2.2248	0.042767	-//-
Traes_5AS_2743D6D23	-2.0521	5.3008e-09	LOC_Os12g35330.1	OsGrx_C12 - glutaredoxin subgroup III, expressed	predicted protein [Hordeum vulgare subsp. vulgare]
Traes_5BL_C9FD62D61	-2.0214	0.046184	LOC_Os09g07300.1	BIG, putative, expressed	hypothetical protein SORBIDRAFT_07g010440 [Sorghum bicolor] >gi|241940510|gb|EES13655.1| hypothetical protein SORBIDRAFT_07g010440 [Sorghum bicolor]
Traes_5AS_F5FE1307A	-1.9952	0.0002137	LOC_Os12g35330.1	OsGrx_C12 - glutaredoxin subgroup III, expressed	PREDICTED: putative glutaredoxin-C14-like [Brachypodium distachyon]
Novel10985	-1.8018	0.00063028	--	hypothetical protein F775_08261 [Aegilops tauschii]
Traes_1BL_F7884B670	-1.6477	0.018417	LOC_Os05g41640.2	phosphoglycerate kinase protein, putative, expressed	3-phosphoglycerate kinase [Aegilops speltoides]
Traes_3DS_7A5EBEAB4	-1.6317	0.024477	LOC_Os11g40590.2	DUF1399 containing protein, putative, expressed	pg1, putative, expressed [Triticum aestivum]
Traes_5BS_9584239E51	-1.6002	1.3649e-06	LOC_Os12g35340.1	OsGrx_C11 - glutaredoxin subgroup III, expressed	hypothetical protein ZEAMMB73_123557 [Zea mays]
Novel05662	-1.378	0.029985	--	hypothetical protein F775_07858 [Aegilops tauschii]
Novel04982	-1.3101	0.047331	--	pg1, putative, expressed [Triticum aestivum]
Traes_5BL_EB04B5379	-1.2408	0.028239	LOC_Os06g08032.1	flavonol synthase/flavanone 3-hydroxylase, putative, expressed	predicted protein [Hordeum vulgare subsp. vulgare]
Traes_5DS_A92D3B63C	-1.129	0.028239	LOC_Os12g35340.1	OsGrx_C11 - glutaredoxin subgroup III, expressed	hypothetical protein ZEAMMB73_123557 [Zea mays]
Novel11845	-1.1105	0.044161	-//-
Traes_5DL_E863CA1AE	-1.093	0.031464	LOC_Os11g24800.1	expressed protein	Os11g0435500 [Oryza sativa Japonica Group] >gi|255680053|dbj|BAH95244.1| Os11g0435500, partial [Oryza sativa Japonica Group]
Traes_5BS_39B20151B	-0.92178	0.028725	LOC_Os12g35340.1	OsGrx_C11 - glutaredoxin subgroup III, expressed	Os12g0538700 [Oryza sativa Japonica Group] >gi|119370629|sp|Q2QP86.1|GRC15_ORYSJ RecName: Full=Glutaredoxin-C15 >gi|77556541|gb|ABA99337.1| Glutaredoxin-like family protein, expressed [Oryza sativa Japonica Group] >gi|113649450|dbj|BAF29962.1| Os12g0538700 [Oryza sativa Japonica Group] >gi|125579606|gb|EAZ20752.1| hypothetical protein OsJ_36376 [Oryza sativa Japonica Group] >gi|215686538|dbj|BAG8…
Traes_7DL_F3D033677	-0.88485	0.048413	LOC_Os12g18630.1	expressed protein	predicted protein [Hordeum vulgare subsp. vulgare]
Traes_2BL_E8D5E0972	-0.87401	0.024477	LOC_Os04g36800.1	3-oxoacyl-synthase, putative, expressed	RecName: Full=3-oxoacyl-[acyl-carrier-protein] synthase I, chloroplastic; AltName: Full=Beta-ketoacyl-ACP synthase I; Short=KAS I; Flags: Precursor >gi|167065|gb|AAA32968.1| beta-ketoacyl-ACP synthase I [Hordeum vulgare] >gi|326525595|dbj|BAJ88844.1| predicted protein [Hordeum vulgare subsp. vulgare]
Traes_1AL_17F456C3A	-0.86773	0.016973	LOC_Os05g47850.1	chloroplastic group IIA intron splicing facilitator CRS1, chloroplast precursor, putative, expressed	predicted protein [Hordeum vulgare subsp. vulgare]
Traes_2AS_C1EA81EC4	-0.85142	0.019622	LOC_Os12g17910.1	T-complex protein, putative, expressed	RecName: Full=RuBisCO large subunit-binding protein subunit alpha, chloroplastic; AltName: Full=60 kDa chaperonin subunit alpha; AltName: Full=CPN-60 alpha; Flags: Precursor >gi|1345582|emb|CAA30699.1| unnamed protein product [Triticum aestivum]
Novel02889	_inf	9.2515e-05	--	ATP-dependent Clp protease ATP-binding subunit clpC [Aegilops tauschii]
Novel04102	_inf	1.11e-12	--	ATP-dependent Clp protease ATP-binding subunit clpC [Aegilops tauschii]
Novel10679	_inf	0.016973	--	hypothetical protein F775_10959 [Aegilops tauschii]

## Sheet: Time point 5
Differentially expressed genes at time point 5 (anther differentiation stage)
The list of the 34 differentially expressed genes in the experiment is sorted in column A. For each gene are reported the log2 fold change (B), adjusted P value (C), relative homologous rice gene (column C), rice gene annotation (E), GenBank's non-redundant protein database annotation (F). Inf = gene absent in block D.
Gene_id	log2 ratio (block A / block D)	Adjusted pvalue	Rice gene code	Rice gene description	GenBank's non-redundant protein database description
Up regulated
Novel10984	Inf	1.3836e-14	--	Phosphoenolpyruvate carboxylase 1 [Aegilops tauschii]
Novel12881	Inf	7.6764e-28	--	unknown [Zea mays]
Novel12917	Inf	3.1062e-11	-//-
Traes_6DS_DDDDD4154	Inf	1.1879e-07	LOC_Os02g55950.1	ATMAK10, putative, expressed	PREDICTED: N-alpha-acetyltransferase 35, NatC auxiliary subunit-like [Brachypodium distachyon]
Novel12594	6.831	5.9201e-25	--	Serine/threonine-protein kinase Nek3 [Triticum urartu]
Traes_7AS_97A8A5101	3.548	5.2914e-05	LOC_Os10g21268.1	ribulose bisphosphate carboxylase large chain precursor, putative, expressed	ribulose-1,5-bisphosphate carboxylase/oxygenase large subunit [Triticum aestivum] >gi|132065|sp|P11383.2|RBL_WHEAT RecName: Full=Ribulose bisphosphate carboxylase large chain; Short=RuBisCO large subunit; Flags: Precursor >gi|344053|dbj|BAA00146.1| ribulose-1,5-bisphosphate carboxylase/oxygenase large subunit (H-type) [Triticum aestivum] >gi|13928213|dbj|BAB47042.1| RuBisCO large subunit [Triticu…
Novel01161	3.4157	0.0011418	-//-
Traes_7DS_1D74598FD	3.1855	1.3534e-08	LOC_Os10g21268.1	ribulose bisphosphate carboxylase large chain precursor, putative, expressed	ribulosebiphosphate carboxylase [Hordeum brachyantherum]
Traes_4DL_C6340E61D	3.0128	0.0064948	LOC_Os03g22590.1	nodulin MtN3 family protein, putative, expressed	predicted protein [Hordeum vulgare subsp. vulgare] >gi|326520085|dbj|BAK03967.1| predicted protein [Hordeum vulgare subsp. vulgare]
Traes_5DL_CC4E32ECC	2.9779	0.0038757	LOC_Os10g21268.1	ribulose bisphosphate carboxylase large chain precursor, putative, expressed	Os01g0791033 [Oryza sativa Japonica Group] >gi|255673766|dbj|BAH91327.1| Os01g0791033 [Oryza sativa Japonica Group]
Traes_4BS_477BAB497	2.7793	0.0030984	--	--	hypothetical protein SORBIDRAFT_04g012680 [Sorghum bicolor] >gi|241931821|gb|EES04966.1| hypothetical protein SORBIDRAFT_04g012680 [Sorghum bicolor]
TRAES3BF086800130CFD_g	2.6964	3.7935e-05	LOC_Os01g58910.1	auxin-induced protein 5NG4, putative, expressed	predicted protein [Hordeum vulgare subsp. vulgare]
TRAES3BF007300110CFD_g	2.6763	1.0178e-05	LOC_Os10g21268.1	ribulose bisphosphate carboxylase large chain precursor, putative, expressed	Os01g0791033 [Oryza sativa Japonica Group] >gi|255673766|dbj|BAH91327.1| Os01g0791033 [Oryza sativa Japonica Group]
Traes_4AS_5C64449F8	2.5775	6.2101e-10	LOC_Os03g22590.1	nodulin MtN3 family protein, putative, expressed	predicted protein [Hordeum vulgare subsp. vulgare] >gi|326520085|dbj|BAK03967.1| predicted protein [Hordeum vulgare subsp. vulgare]
TRAES3BF136800060CFD_g	2.4031	0.00025989	LOC_Os10g21268.1	ribulose bisphosphate carboxylase large chain precursor, putative, expressed	rbcL [Triticum aestivum]
Novel10986	2.3069	1.0305e-11	--	hypothetical protein F775_00382 [Aegilops tauschii]
TRAES3BF007300100CFD_g	2.1929	0.016538	-//-
Novel21792	2.1607	0.00091856	--	predicted protein [Hordeum vulgare subsp. vulgare]
Traes_3AL_0611800C6	2.1354	1.8451e-09	LOC_Os01g37910.1	vacuolar-processing enzyme precursor, putative, expressed	predicted protein [Hordeum vulgare subsp. vulgare]
EPlTAEG00000010042	1.9818	0.0003792	LOC_Os05g22716.1	translation initiation factor IF-1, chloroplast, putative, expressed	translational initiation factor 1 [Festuca pratensis]
Traes_2DL_77F25CE27	1.7947	0.0065836	LOC_Os01g37460.1	zinc finger family protein, putative, expressed	PREDICTED: uncharacterized RNA-binding protein C17H9.04c-like [Brachypodium distachyon]
Traes_2BL_E858BADD2	1.7431	0.0024263	LOC_Os04g33920.1	LTPL102 - Protease inhibitor/seed storage/LTP family protein precursor, expressed	predicted protein [Hordeum vulgare subsp. vulgare]
TRAES3BF057800110CFD_g	1.6514	0.0004937	-//-
Traes_5DS_9031479C6	1.6244	0.00070213	LOC_Os12g41090.1	CAMK_KIN1/SNF1/Nim1_like.38 - CAMK includes calcium/calmodulin depedent protein kinases, expressed	predicted protein [Hordeum vulgare subsp. vulgare]
Traes_6DL_BD842B321	1.6079	0.023953	LOC_Os02g43330.1	homeobox associated leucine zipper, putative, expressed	predicted protein [Hordeum vulgare subsp. vulgare]
Traes_6AL_73E54964D	1.5263	0.0055656	LOC_Os01g33420.1	glycosyl hydrolase family protein 27, putative, expressed	PREDICTED: uncharacterized protein LOC100823981 [Brachypodium distachyon]
Traes_4AS_C19AB3A1A	1.5239	0.047086	LOC_Os03g18130.4	asparagine synthetase, putative, expressed	predicted protein [Hordeum vulgare subsp. vulgare]
Traes_1BL_6B21370DA	1.4598	0.034029	LOC_Os05g31020.1	eukaryotic peptide chain release factor subunit 1-1, putative, expressed	PREDICTED: eukaryotic peptide chain release factor subunit 1-2-like isoform 1 [Brachypodium distachyon] >gi|357133936|ref|XP_003568577.1| PREDICTED: eukaryotic peptide chain release factor subunit 1-2-like isoform 2 [Brachypodium distachyon]
Traes_5DL_8DF05B9AA	1.3927	0.008583	LOC_Os07g01710.1	phytosulfokine receptor precursor, putative, expressed	predicted protein [Hordeum vulgare subsp. vulgare]
Novel10985	1.3908	0.047086	--	hypothetical protein F775_08261 [Aegilops tauschii]
Traes_5BS_ECB15B15A	1.3545	0.0048102	LOC_Os12g41090.1	CAMK_KIN1/SNF1/Nim1_like.38 - CAMK includes calcium/calmodulin depedent protein kinases, expressed	predicted protein [Hordeum vulgare subsp. vulgare]
Novel12876	1.333	0.042923	--	hypothetical protein [Zea mays]
Traes_3DL_304C8DD67	1.3263	0.0007019	LOC_Os01g37910.2	vacuolar-processing enzyme precursor, putative, expressed	predicted protein [Hordeum vulgare subsp. vulgare]
Traes_4BL_00AAC9279	1.3004	0.00038097	LOC_Os03g05334.1	expressed protein	--
Traes_4DL_D7C83DB52	1.2891	0.00010391	LOC_Os03g05334.1	expressed protein	predicted protein [Hordeum vulgare subsp. vulgare]
Traes_4AL_2F1BCBC7D	1.2049	0.047094	LOC_Os06g04920.1	zinc finger family protein, putative, expressed	predicted protein [Hordeum vulgare subsp. vulgare]
Novel09824	1.1114	0.0091162	-//-
Down regulated
Traes_2BL_96781E1E3	-5.8643	0.021725	LOC_Os03g22210.1	POEI46 - Pollen Ole e I allergen and extensin family protein precursor, expressed	PREDICTED: uncharacterized protein LOC100846136 [Brachypodium distachyon]
Traes_6AL_E75EEA743	-3.0281	0.0012469	LOC_Os03g22230.1	POEI47 - Pollen Ole e I allergen and extensin family protein precursor, expressed	PREDICTED: uncharacterized protein LOC100846136 [Brachypodium distachyon]
Traes_4BL_3D01BD770	-2.692	0.0013545	LOC_Os03g01300.1	LTPL114 - Protease inhibitor/seed storage/LTP family protein precursor, expressed	predicted protein [Hordeum vulgare subsp. vulgare]
Traes_5BL_5B9259D26	-1.5291	0.023953	LOC_Os08g42590.3	mtN19, putative, expressed	predicted protein [Hordeum vulgare subsp. vulgare]
Traes_5BS_197E3DE21	-1.5171	0.001841	LOC_Os08g01510.1	cytochrome P450, putative, expressed	P450 [Triticum aestivum] >gi|164455198|dbj|BAF97100.1| P450 [Triticum aestivum]
Traes_5DL_F745042D8	-1.4774	0.0003227	LOC_Os08g42590.3	mtN19, putative, expressed	predicted protein [Hordeum vulgare subsp. vulgare]
Novel09755	-1.2925	0.0052935	--	P450 [Triticum aestivum]>gi|164455199|dbj|BAF97101.1| P450 [Triticum aestivum]

## Sheet: Time point 6
Differentially expressed genes at time point 6 (tetrad stage)
The list of the 8 differentially expressed genes in the experiment is sorted in column A. For each gene are reported the log2 fold change (B), adjusted P value (C), relative homologous rice gene (column C), rice gene annotation (E), GenBank's non-redundant protein database annotation (F). _Inf = gene absent in block A.
Gene_id	log2 ratio (block A / block D)	Adjusted pvalue	Rice gene code	Rice gene description	GenBank's non-redundant protein database description
Up regulated
Traes_2DS_229D264D2	7.7611	2.79e-26	LOC_Os12g40480.2	H-BTB9 - Bric-a-Brac, Tramtrack, Broad Complex BTB domain with H family conserved sequence, expressed	predicted protein [Hordeum vulgare subsp. vulgare]
Traes_2DS_BB50DEEF8	4.5327	1.86e-22	LOC_Os03g20700.2	magnesium-chelatase, putative, expressed	unknown [Zea mays]
Down regulated
Novel02889	_inf	0.018007	--	ATP-dependent Clp protease ATP-binding subunit clpC [Aegilops tauschii]
Novel04102	_inf	1.86e-22	--	ATP-dependent Clp protease ATP-binding subunit clpC [Aegilops tauschii]
Traes_4DS_D764CD992	-1.8298	0.030363	LOC_Os11g06870.1	glyoxal oxidase-related, putative, expressed	Os11g0169700 [Oryza sativa Japonica Group] >gi|62701933|gb|AAX93006.1| probable galactose oxidase (EC 1.1.3.9) F15B8.190 [similarity] - Arabidopsis thaliana [Oryza sativa Japonica Group] >gi|77548816|gb|ABA91613.1| Glyoxal oxidase N-terminus family protein, expressed [Oryza sativa Japonica Group] >gi|255679825|dbj|BAH95100.1| Os11g0169700 [Oryza sativa Japonica Group]
Traes_6AS_0007CA8D6	-2.7015	0.0041112	LOC_Os09g16010.1	BURP domain containing protein, expressed	predicted protein [Hordeum vulgare subsp. vulgare]
Novel01365	-3.0284	0.0078104	--	Serine/threonine-protein phosphatase BSL1-like protein [Triticum urartu]
Novel08700	-3.0347	0.023544	--	hypothetical protein F775_25282 [Aegilops tauschii]

## Sheet: Time point 8
Differentially expressed genes at time point 8 (early flowering stage)
The list of the 17 differentially expressed genes in the experiment is sorted in column A. For each gene are reported the log2 fold change (B), adjusted P value (C), relative homologous rice gene (column C), rice gene annotation (E), GenBank's non-redundant protein database annotation (F).
Gene_id	log2 ratio (block C / block D)	Adjusted pvalue	Rice gene code	Rice gene description	GenBank's non-redundant protein database description
Up regulated
Traes_5BL_2F28515DE	0.92843	0.0056968
Down regulated
Traes_7DS_1D74598FD	-1.5275	2.6031e-11	LOC_Os10g21268.1	ribulose bisphosphate carboxylase large chain precursor, putative, expressed	ribulosebiphosphate carboxylase [Hordeum brachyantherum]
Traes_7DS_425ED0B6D	-1.5275	0.002693	LOC_Os06g04510.1	enolase, putative, expressed	PREDICTED: enolase 1-like [Brachypodium distachyon]
TRAES3BF077200010CFD_g	-1.8702	0.002693	LOC_Os01g68580.1	LTPL38 - Protease inhibitor/seed storage/LTP family protein precursor, expressed	predicted protein [Hordeum vulgare subsp. vulgare]
Novel10612	-4.3543	0.020915		Phytosulfokine receptor 2 [Aegilops tauschii]
Traes_5DL_39926945A	-7.1891	2.7915e-62	LOC_Os09g39740.1	ACT domain containing protein, expressed	predicted protein [Hordeum vulgare subsp. vulgare]

## Sheet: Time point 9
Differentially expressed genes at time point 9 (grain formation stage)
The list of the 25 differentially expressed genes in the experiment is sorted in column A. For each gene are reported the log2 fold change (B), adjusted P value (C), relative homologous rice gene (column C), rice gene annotation (E), GenBank's non-redundant protein database annotation (F). Inf = gene absent in block D. _Inf = gene absent in block A.
Gene_id	log2 ratio (block C / block D)	Adjusted pvalue	Rice gene code	Rice gene description	GenBank's non-redundant protein database description
Up regulated
Novel09251	Inf	1.1668e-09	--	Protein FAR-RED ELONGATED HYPOCOTYL 3 [Aegilops tauschii]
Novel21511	2.8851	0.0026853	--	Putative inactive serine/threonine-protein kinase lvsG [Aegilops tauschii]
Down regulated
Novel09250	_inf	5.1599e-17	--	hypothetical protein TRIUR3_24696 [Triticum urartu]
Traes_5AL_3D9E58850	-6.056	1.1208e-08	LOC_Os03g28960.1	DNA-directed RNA polymerase subunit, putative, expressed	RecName: Full=Alpha-amylase AMY3; AltName: Full=1,4-alpha-D-glucan glucanohydrolase; Flags: Precursor >gi|21818|emb|CAA29252.1| alpha-amylase [Triticum aestivum] >gi|170672|gb|AAA34259.1| alpha-amylase [Triticum aestivum] >gi|225969|prf||1404375A alpha amylase
Novel16494	-3.817	1.2005e-06	-//-
Novel19514	-3.7497	2.512e-12	--	hypothetical protein F775_21041 [Aegilops tauschii]
Novel16157	-3.1953	0.00095489	--	hypothetical protein F775_12710 [Aegilops tauschii]
Traes_2BL_33E5CFD18	-3.021	0.018505	LOC_Os06g46284.1	glycosyl hydrolase, family 31, putative, expressed	predicted protein [Hordeum vulgare subsp. vulgare]
Novel03087	-2.8249	0.0096132	--	hypothetical protein TRIUR3_12519 [Triticum urartu]
Traes_1BS_0CE406646	-2.5439	0.018505	LOC_Os10g11060.1	ACI13, putative, expressed	predicted protein [Hordeum vulgare subsp. vulgare]
Novel22424	-2.5005	1.0643e-06	--	Defensin-like protein P322 [Aegilops tauschii]	PREDICTED: uncharacterized protein LOC100821122 [Brachypodium distachyon]
Novel03641	-2.2653	0.016231	--	Peroxidase 2 [Aegilops tauschii]
Traes_7AL_F07B5EBC5	-2.2631	0.0066552	LOC_Os01g46210.1	GDSL-like lipase/acylhydrolase, putative, expressed	predicted protein [Hordeum vulgare subsp. vulgare]
Novel12362	-2.2473	0.0095	--	hypothetical protein F775_12710 [Aegilops tauschii]
Novel10339	-2.1995	0.0004726	--	hypothetical protein F775_24142 [Aegilops tauschii]
Traes_7BL_AFEB10182	-1.9788	0.017636	LOC_Os01g46210.1	GDSL-like lipase/acylhydrolase, putative, expressed
Novel04966	-1.9423	0.011926	-//-
Traes_5DL_91B56C21D	-1.8116	0.00014529	LOC_Os08g36900.1	alpha-amylase precursor, putative, expressed	predicted protein [Hordeum vulgare subsp. vulgare]
Traes_2BL_A73179F08	-1.7818	0.030518	LOC_Os02g37800.1	lecithin:cholesterol acyltransferase, putative, expressed	predicted protein [Hordeum vulgare subsp. vulgare]
Traes_2BS_ED3652A2E	-1.7631	0.0056661	LOC_Os07g48650.1	OsSub54 - Putative Subtilisin homologue, expressed	PREDICTED: probable beta-D-xylosidase 7-like [Brachypodium distachyon]
Traes_5BL_AC845F1C1	-1.7057	0.0026987	LOC_Os08g36900.1	alpha-amylase precursor, putative, expressed	RecName: Full=Alpha-amylase AMY3; AltName: Full=1,4-alpha-D-glucan glucanohydrolase; Flags: Precursor >gi|21818|emb|CAA29252.1| alpha-amylase [Triticum aestivum] >gi|170672|gb|AAA34259.1| alpha-amylase [Triticum aestivum] >gi|225969|prf||1404375A alpha amylase
Novel00249	-1.7056	0.048726	--	hypothetical protein F775_23859 [Aegilops tauschii]
Novel16084	-1.6231	0.039246	--	hypothetical protein F775_23859 [Aegilops tauschii]
Traes_5BL_D1DF6C31E	-1.6049	0.047883	LOC_Os08g36900.1	alpha-amylase precursor, putative, expressed	RecName: Full=Alpha-amylase AMY3; AltName: Full=1,4-alpha-D-glucan glucanohydrolase; Flags: Precursor >gi|21818|emb|CAA29252.1| alpha-amylase [Triticum aestivum] >gi|170672|gb|AAA34259.1| alpha-amylase [Triticum aestivum] >gi|225969|prf||1404375A alpha amylase
Traes_4AL_4AE9E46B4	-1.5887	0.0056661	LOC_Os11g18730.1	glycosyl hydrolase family 3 protein, putative, expressed	Os03g0403100 [Oryza sativa Japonica Group] >gi|108708688|gb|ABF96483.1| DNA-directed RNA polymerase III 130 kDa polypeptide, putative, expressed [Oryza sativa Japonica Group] >gi|113548794|dbj|BAF12237.1| Os03g0403100 [Oryza sativa Japonica Group]
